# Supplementary material
Source: PubMed Central journal article supplement (PMC6645932)

## SUPPORTING INFORMATION

Orthogonal synthetic zippers as protein scaffolds

George P. Anderson<sup>1</sup>, Lisa C Shriver-Lake<sup>1</sup>, Jinny L. Liu<sup>1</sup> and Ellen R. Goldman<sup>1\*</sup>

<sup>1</sup> Center for BioMolecular Science and Engineering, U.S. Naval Research Laboratory, 4555 Overlook Avenue SW, Washington, District of Columbia 20375 USA

\*corresponding author, ellen.goldman@nrl.navy.mil

Contents:

|                                                                   |     |
|-------------------------------------------------------------------|-----|
| Title page                                                        | S1  |
| Figure S1, Protein sequences of constructs described in this work | S3  |
| Figure S2, Cartoon of the steps involved in the SPR experiments   | S8  |
| Figure S3, SPR data                                               | S9  |
| Figure S4, Size exclusion chromatography                          | S25 |
| Table S1, Table of yields                                         | S26 |
| Table S2, Table of zipper charge                                  | S27 |
| Table S3, Table of binding affinities                             | S28 |
| Figure S5, SPR data corresponding to Table S3                     | S29 |

Figure S1. Protein sequences of constructs described in this work. Constructs are designated by abbreviating the domains in the order they occurred using the letter designation of the sdAb (D or A) and the number of the SYNZIP (1, 2, 3, 4, 5, 6, 17, 18) or designation E34m and R34m for the charged zipper pair. Protein sequences are given using single letter amino acid codes. Glycine-Serine (GS)-based linkers separate the domains as well as separate the final domain from the Histidine tail used for protein purification. The protein sequence, including the sdAb, linkers, and zipper are given for each construct that we produced and evaluated.

>D-1

EVQLQASGGGLVQDGGSLRLSCAVAGRPLSDYGVGWFRQASGKEREFVAVISGSGIV  
TDYANSVKGRFTISRDAKAVVHLMNSLKPEDTAVYYCAALTNPVYAASRNSNDYG  
YWGQGTQVTVSSAAAGGGGSGGGGSGSNLVAQLENEVASLENENETLKKKNLHKKDL  
IAYLEKEIANLRKKIEEGGGGSGGGGSGSGLEHHHHHH

>D-2

EVQLQASGGGLVQDGGSLRLSCAVAGRPLSDYGVGWFRQASGKEREFVAVISGSGIV  
TDYANSVKGRFTISRDAKAVVHLMNSLKPEDTAVYYCAALTNPVYAASRNSNDYG  
YWGQGTQVTVSSAAAGGGGSGGGGSGSARNAYLRKKIARLKKDNLQLERDEQNLEKI  
IANLRDEIARLENEVASHEQGGGGSGGGGSGSGLEHHHHHH

>D-3

EVQLQASGGGLVQDGGSLRLSCAVAGRPLSDYGVGWFRQASGKEREFVAVISGSGIV  
TDYANSVKGRFTISRDAKAVVHLMNSLKPEDTAVYYCAALTNPVYAASRNSNDYG  
YWGQGTQVTVSSAAAGGGGSGGGGSGSNEVTTLENDAAFIENENAYLEKEIARLRKE  
KAALRNRLAHKKGGGGSGGGGSGSGLEHHHHHH

>D-4

EVQLQASGGGLVQDGGSLRLSCAVAGRPLSDYGVGWFRQASGKEREFVAVISGSGIV  
TDYANSVKGRFTISRDAKAVVHLMNSLKPEDTAVYYCAALTNPVYAASRNSNDYG  
YWGQGTQVTVSSAAAGGGGSGGGGSGSQKVAELKNRVAVKLNREQLKNKVEELKNR  
NAYLKNELATLENEVARLENDVAEGGGGSGGGGSGSGLEHHHHHH

>D-1-3

EVQLQASGGGLVQDGGSLRLSCAVAGRPLSDYGVGWFRQASGKEREFVAVISGSGIV  
TDYANSVKGRFTISRDAKAVVHLMNSLKPEDTAVYYCAALTNPVYAASRNSNDYG  
YWGQGTQVTVSSAAAGGGGSGGGGSGSNLVAQLENEVASLENENETLKKKNLHKKDL  
IAYLEKEIANLRKKIEEGGGGSGGGGSGSNEVTTLENDAAFIENENAYLEKEIARLR  
KEKAALRNRLAHKKGGGGSGGGGSGSGLEHHHHHH

>D-3-1

EVQLQASGGGLVQDGGSLRLSCAVAGRPLSDYGVGWFRQASGKEREVAVISGSGIV  
TDYANSVKGRFTISRDVAKNVVHLQMNSLKPEDTAVYYCAALTNPVYAASRNSNDYG  
YWGQGTQVTVSSAAAGGGGSGGGGSGSNEVTTLENDAAFIENENAYLEKEIARLRKE  
KAALRNRLAHKKGGGGSGGGGSGSNLVAQLENEVASLENENETLKKKNLHKKDLIAY  
LEKEIANLRKKIEEGGGGSGGGGSGSGLEHHHHHH

>D-5

EVQLQASGGGLVQDGGSLRLSCAVAGRPLSDYGVGWFRQASGKEREVAVISGSGIV  
TDYANSVKGRFTISRDVAKNVVHLQMNSLKPEDTAVYYCAALTNPVYAASRNSNDYG  
YWGQGTQVTVSSAAAGGGGSGGGGSGSGSNTVKELKNYIQELEERNAELKNLKEHLK  
FAKAELEFELAAHKFEGGGGSGGGGSGSGLEHHHHHH

>D-6

EVQLQASGGGLVQDGGSLRLSCAVAGRPLSDYGVGWFRQASGKEREVAVISGSGIV  
TDYANSVKGRFTISRDVAKNVVHLQMNSLKPEDTAVYYCAALTNPVYAASRNSNDYG  
YWGQGTQVTVSSAAAGGGGSGGGGSGSGSQKVAQLKNRVAYKLNENAKLENIVARLE  
NDNANLEKDIANLEKDIANLERDVARGGGGGSGGGGSGSGLEHHHHHH

>D-17

EVQLQASGGGLVQDGGSLRLSCAVAGRPLSDYGVGWFRQASGKEREVAVISGSGIV  
TDYANSVKGRFTISRDVAKNVVHLQMNSLKPEDTAVYYCAALTNPVYAASRNSNDYG  
YWGQGTQVTVSSAAAGGGGSGGGGSGSGSNEKEELKSKKAELRNRIEQLKQKREQLK  
QKIANLRKEIEAYKGGGGSGGGGSGSGLEHHHHHH

>D-18

EVQLQASGGGLVQDGGSLRLSCAVAGRPLSDYGVGWFRQASGKEREVAVISGSGIV  
TDYANSVKGRFTISRDVAKNVVHLQMNSLKPEDTAVYYCAALTNPVYAASRNSNDYG  
YWGQGTQVTVSSAAAGGGGSGGGGSGSGSSIAATLENDLARLENENARLEKDIANLE  
RDLAKLEREEAYFGGGGSGGGGSGSGLEHHHHHH

>D-E34m

EVQLQASGGGLVQDGGSLRLSCAVAGRPLSDYGVGWFRQASGKEREVAVISGSGIV  
TDYANSVKGRFTISRDVAKNVVHLQMNSLKPEDTAVYYCAALTNPVYAASRNSNDYG  
YWGQGTQVTVSSAAAGGGGSGGGGSGSITIRAAFLEKENTALRTEIAELEKEVGRSE  
NIVSKYETRYGPLGSGGSGSGGSGSGLEHHHHHH

>D-R34m

EVQLQASGGGLVQDGGSLRLSCAVAGRPLSDYGVGWFRQASGKERE FVAVISGSGIV  
TDYANSVKGRFTISRDAKNVHLQMNLSLKPEDTAVYYCAALTNPVYAASRNSNDYG  
YWGQGTQVTVSSAAAGGGGSGGGGSGSLEIRAAFLEKENTALRTRAAELRKVGRSRN  
IVSKYETRYGPLGSGGSGSGGSGSGLEHHHHHH

>A-1

EFARSDVQLVESGGGLVQPGGSLRLTCAASGLIFGSYAMGWFRQAPGKAREFVAAIS  
WSGGDTYADSVKGRFTISRDNANTVYVYLMNSLEPEDTAVYSCAAVGSKYIISKDAK  
DYGWYWGQGTQVTVSSAAAGGGGSGGGGSGSNLVAQLENEVASLENENETLKKKNLHK  
KDLIAYLEKEIANLRKKIEEGGGGSGGGGSGSGLEHHHHHH

>A-2

EFARSDVQLVESGGGLVQPGGSLRLTCAASGLIFGSYAMGWFRQAPGKAREFVAAIS  
WSGGDTYADSVKGRFTISRDNANTVYVYLMNSLEPEDTAVYSCAAVGSKYIISKDAK  
DYGWYWGQGTQVTVSSAAAGGGGSGGGGSGSARNAYLRKKIARLKKDNLQLERDEQNL  
EKNIANLRDEIARLENEVASHEQGGGGSGGGGSGSGLEHHHHHH

>A-3

EFARSDVQLVESGGGLVQPGGSLRLTCAASGLIFGSYAMGWFRQAPGKAREFVAAIS  
WSGGDTYADSVKGRFTISRDNANTVYVYLMNSLEPEDTAVYSCAAVGSKYIISKDAK  
DYGWYWGQGTQVTVSSAAAGGGGSGGGGSGSNEVTTLNDAAFIENENAYLEKEIARL  
RKEKAALRNRLAHKKGGGGSGGGGSGSGLEHHHHHH

>A-4

EFARSDVQLVESGGGLVQPGGSLRLTCAASGLIFGSYAMGWFRQAPGKAREFVAAIS  
WSGGDTYADSVKGRFTISRDNANTVYVYLMNSLEPEDTAVYSCAAVGSKYIISKDAK  
DYGWYWGQGTQVTVSSAAAGGGGSGGGGSGSQKVAELKNRVAVKLNREQLKNKVEEL  
KNRNAYLKNELEATLENEVARLENDVAEGGGGSGGGGSGSGLEHHHHHH

>1-A

EFARSNLVAQLENEVASLENENETLKKKNLHKKDLIAYLEKEIANLRKKIEVGGGGG  
GGGGSGSDVQLVESGGGLVQPGGSLRLTCAASGLIFGSYAMGWFRQAPGKAREFVAA  
VWSGGDTYADSVKGRFTISRDNANTVYVYLMNSLEPEDTAVYSCAAVGSKYIISKD  
AKDYGWYWGQGTQVTVSSAAAGGGGSGGGGSGSGLEHHHHHH

>3-A

EFARSNEVTTLNDAAFIENENAYLEKEIARLRKEKAALRNRLAHKKGGGGSGGGG  
GSDVQLVESGGGLVQPGGSLRLTCAASGLIFGSYAMGWFRQAPGKAREFVAAISWSG  
GDTYADSVKGRFTISRDNANTVYVYLMNSLEPEDTAVYSCAAVGSKYIISKDAKDYG  
YWGQGTQVTVSSAAAGGGGSGGGGSGSGLEHHHHHH

>4-A

EFARSQKVAELKNRVAVKLNREQLKNKVEELKNRNAYLKNELATLENEVARLENDV  
AEGGGGSGGGGSGSDVQLVESGGGLVQPGGSLRLTCAASGLIFGSYAMGWFRQAPGK  
AREFVAAISWSGGDTYADSVKGRFTISRDNANTVYLMNSLEPEDTAVYSCAAVGS  
KYYISKDAKDYGWQGTQVTVSSAAAGGGGSGGGGSGSGLEHHHHHH

>A-1-A

EFARSDVQLVESGGGLVQPGGSLRLTCAASGLIFGSYAMGWFRQAPGKAREFVAAIS  
WSGGDTYADSVKGRFTISRDNANTVYLMNSLEPEDTAVYSCAAVGSKYYISKDAK  
DYGWQGTQVTVSSAAAGGGGSGGGGSGSNLVAQLENEVASLENENETLKKKNLHK  
KDLIAYLEKEIANLRKKIEEGGGGSGGGGSGSDVQLVESGGGLVQPGGSLRLTCAAS  
GLIFGSYAMGWFRQAPGKAREFVAAISWSGGDTYADSVKGRFTISRDNANTVYLMN  
NSLEPEDTAVYSCAAVGSKYYISKDAKDYGWQGTQVTVSSAAAGGGGSGGGGSGS  
GLEHHHHHH

>A-5

EFARSDVQLVESGGGLVQPGGSLRLTCAASGLIFGSYAMGWFRQAPGKAREFVAAIS  
WSGGDTYADSVKGRFTISRDNANTVYLMNSLEPEDTAVYSCAAVGSKYYISKDAK  
DYGWQGTQVTVSSAAAGGGGSGGGGSGSGSNTVKELKNYIQELEERNAELKNLKE  
HLKFAKAELEFELAAHKFEGGGGSGGGGSGSGLEHHHHHH

>A-6

EFARSDVQLVESGGGLVQPGGSLRLTCAASGLIFGSYAMGWFRQAPGKAREFVAAIS  
WSGGDTYADSVKGRFTISRDNANTVYLMNSLEPEDTAVYSCAAVGSKYYISKDAK  
DYGWQGTQVTVSSAAAGGGGSGGGGSGSGSQKVAQLKNRVAYKLNENAKLENIVA  
RLENDNANLEKDIANLEKDIANLERDVARGGGGSGGGGSGSGLEHHHHHH

>A-17

EFARSDVQLVESGGGLVQPGGSLRLTCAASGLIFGSYAMGWFRQAPGKAREFVAAIS  
WSGGDTYADSVKGRFTISRDNANTVYLMNSLEPEDTAVYSCAAVGSKYYISKDAK  
DYGWQGTQVTVSSAAAGGGGSGGGGSGSGSNEKEELKSKKAELRNRIEQLKQKRE  
QLKQKIANLRKEIEAYKGGGGSGGGGSGSGLEHHHHHH

>A-18

EFARSDVQLVESGGGLVQPGGSLRLTCAASGLIFGSYAMGWFRQAPGKAREFVAAIS  
WSGGDTYADSVKGRFTISRDNANTVYLMNSLEPEDTAVYSCAAVGSKYYISKDAK  
DYGWQGTQVTVSSAAAGGGGSGGGGSGSGSSIAATLENDLARLENENARLEKDI  
ANLERDLAKLEREEAYFGGGGSGGGGSGSGLEHHHHHH

>A-E34m

EFARSDVQLVESGGGLVQPGGSLRLTCAASGLIFGSYAMGWRQAPGKAREFVAAIS  
WSGGDTYADSVKGRFTISRDNKNTVYLMNSLEPEDTAVYSCAAVGSKYIISKDAK  
DYGWYWGQGTQVTVSSAAAGGGGSGGGGSGSITIRAAFLEKENTALRTEIAELEKEVG  
RSENIVSKYETRYGPLGSGGSGSGGSGSGGLEHHHHHH

>A-R34m

EFARSDVQLVESGGGLVQPGGSLRLTCAASGLIFGSYAMGWRQAPGKAREFVAAIS  
WSGGDTYADSVKGRFTISRDNKNTVYLMNSLEPEDTAVYSCAAVGSKYIISKDAK  
DYGWYWGQGTQVTVSSAAAGGGGSGGGGSGSLEIRAAFLEKENTALRTRAAELRKRVG  
RSRNIVSKYETRYGPLGSGGSGSGGSGSGGLEHHHHHH

Figure S2. Cartoon of the steps involved in the SPR experiments. In step 1, ricin is covalently immobilized on all columns of the SPR chip. Step 2 consists of flowing six D-SYNZIP constructs, each in its own column (channel). The D portion of the construct binds tightly to the immobilized ricin, serving to orient the zipper domain. For step 3, serial dilutions of an A-SYNZIP construct are run across the channel in six rows; the dilutions always include a no-protein blank. This step enables the calculation of the on rate constants. In the final step (step4), buffer is flowed over each row. This enables the calculation of the off rate constant. The process enables the determination of both specificity and binding kinetics for each pair.

**1. Immobilize ricin on SPR chip**

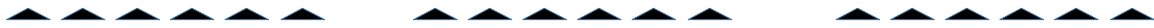

**2. Immobilize each of six D-SYNZIPs in a separate channel (3 shown for simplicity)**

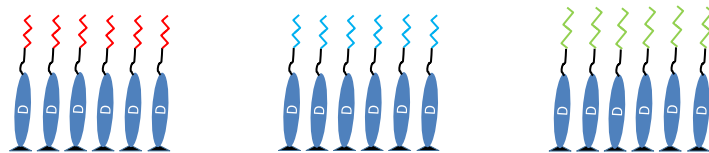

**3. Flow dilutions of A-SYNZIP constructs across channels**

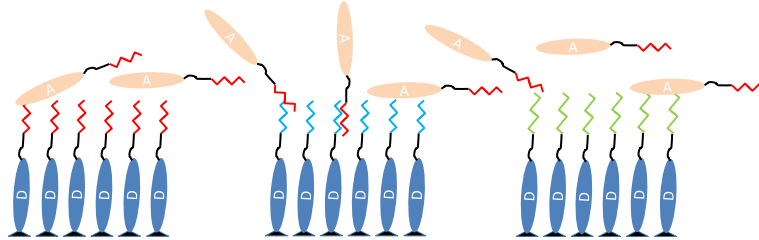

**4. Wash and observe what stays bound**

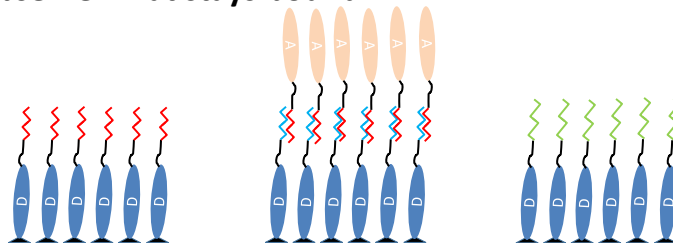



Figure S3. SPR data. Panels A-O follow (on pages S-10 through S24) showing representative SPR data collected in this work. Data was collected on two chips. One chip had the proteins D-1, D-2, D-3, D-4, D-1-3, D-3-1 immobilized each in its own column. The second chip had D-5, D-6, D-17, D-18, D-E34m, D-R34m immobilized in their own columns. Concentrations of the partner SYNZIP construct flowed over the chip are in nM and noted to the right of each trace. In panels A-N, on top we show the data for binding to each of the six immobilized D-SYNZIP constructs and on the bottom we show enlarged versions of the curve showing binding to the primary binding partner. Panel O shows 2 enlarged curves. All the enlarged curve shows the fit as well as the binding kinetics and dissociation constant. Each panel has a separate sub-legend describing the interactions that are shown on that page.

Figure S3-A: Top- A1 binding to D-1, D-1, D-3, D-4, D-1-3, D-3-1; Bottom – Enlarged view of A-1 binding to D-2 with affinity constants shown.

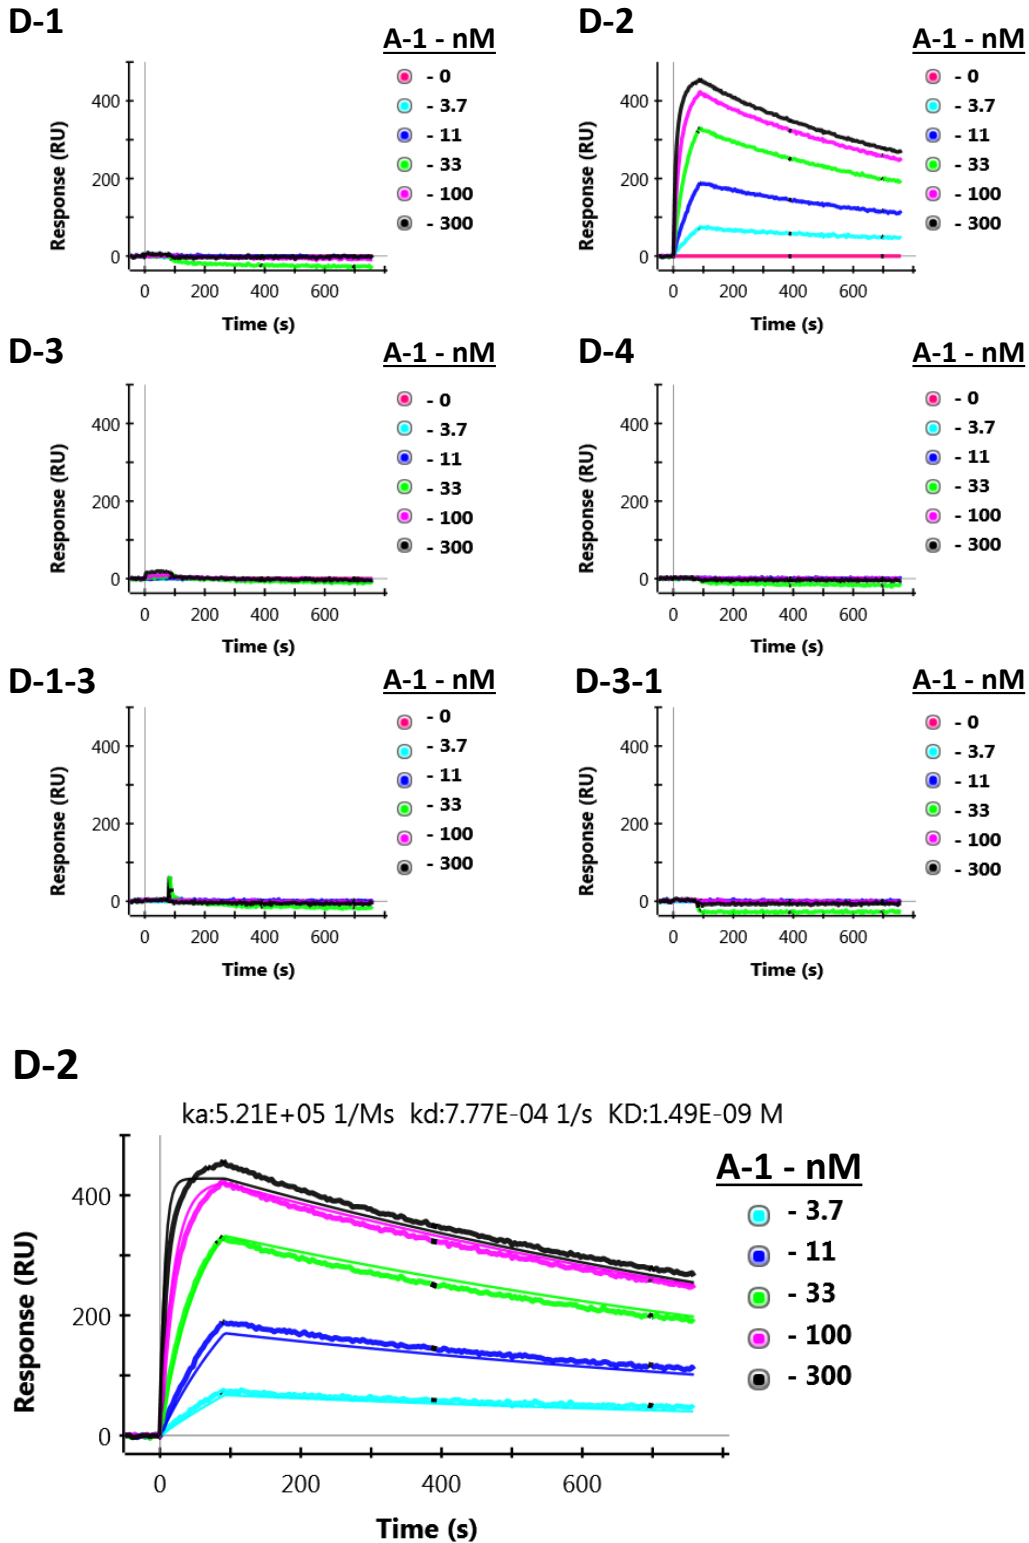

Figure S3-B: Top- A2 binding to D-1, D-1, D-3, D-4, D-1-3, D-3-1; Bottom – Enlarged view of A-2 binding to D-1 with affinity constants shown.

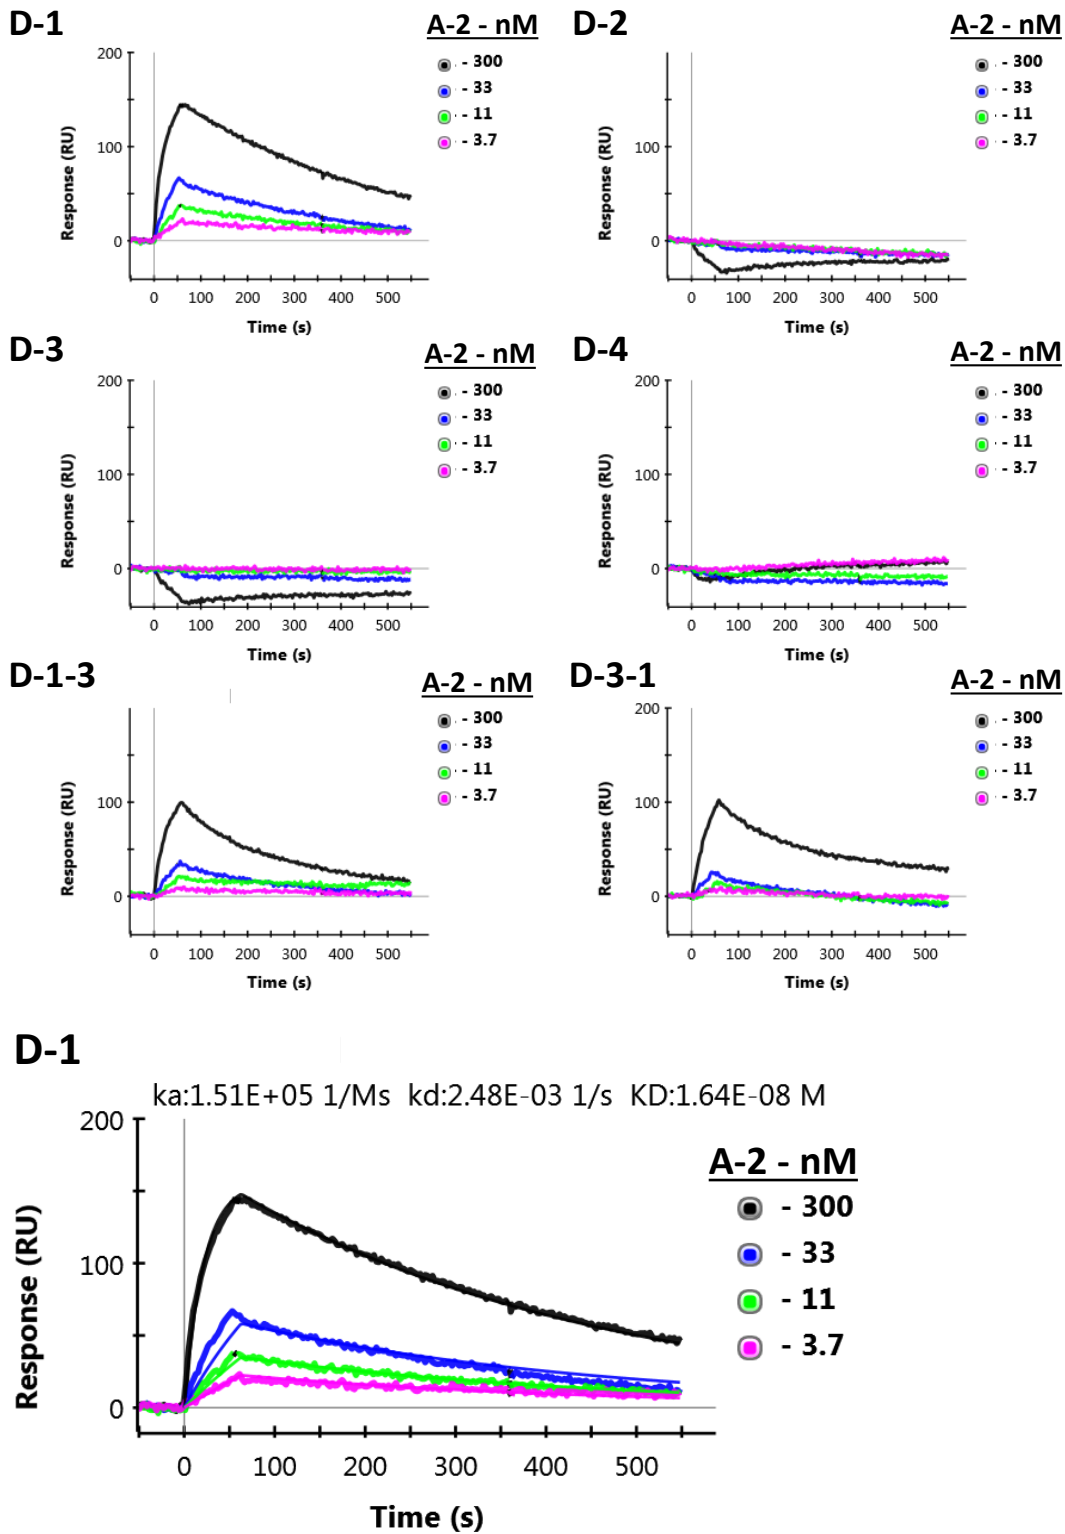

Figure S3-C: Top- A3 binding to D-1, D-1, D-3, D-4, D-1-3, D-3-1; Bottom – Enlarged view of A-3 binding to D-4 with affinity constants shown.

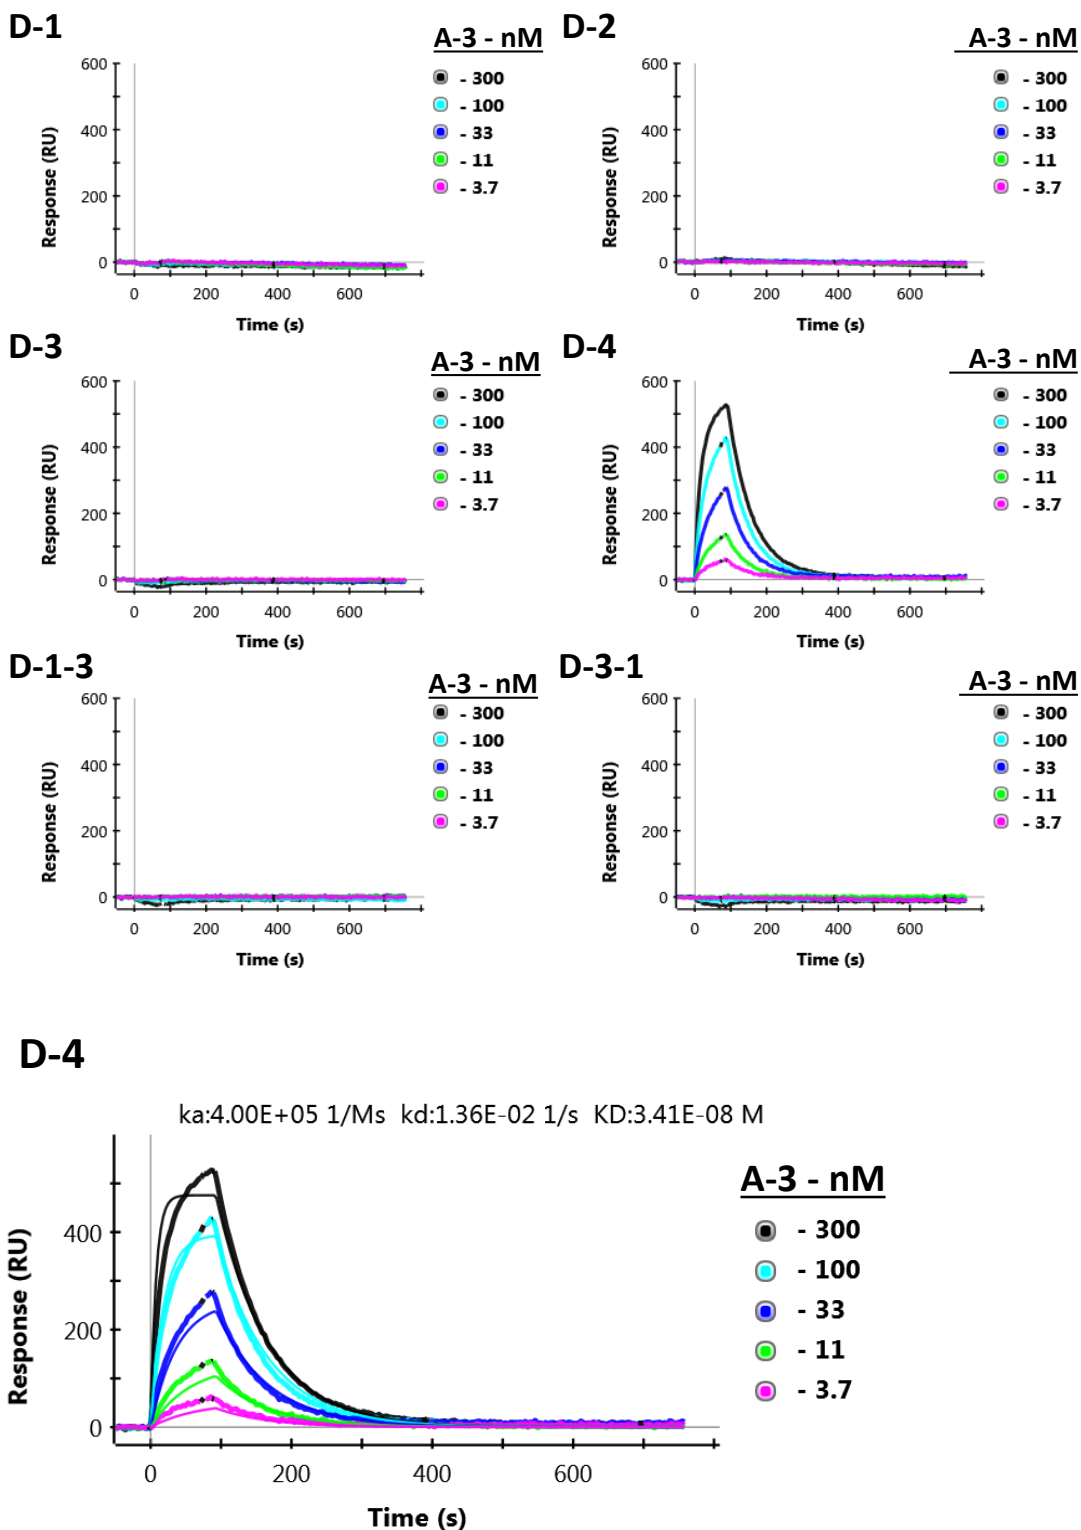

Figure S3-D: Top- A4 binding to D-1, D-1, D-3, D-4, D-1-3, D-3-1; Bottom – Enlarged view of A-3 binding to D-3 with affinity constants shown.

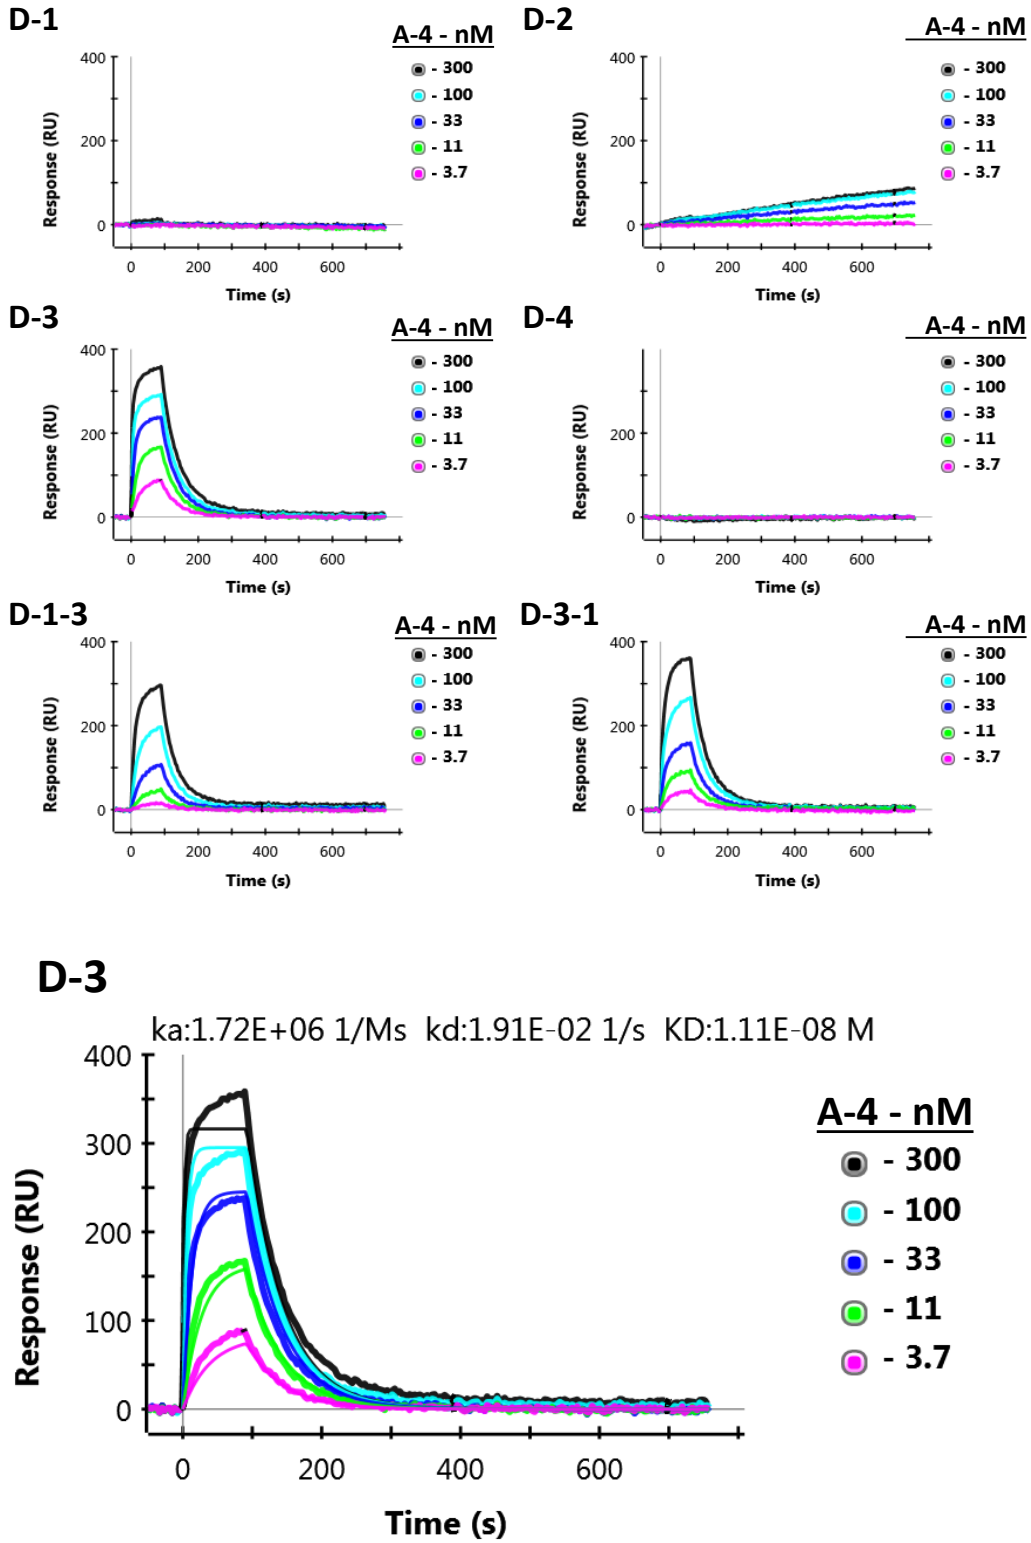

Figure S3-E: Top- 1-A binding to D-1, D-1, D-3, D-4, D-1-3, D-3-1; Bottom – Enlarged view of 1-A binding to D-2 with affinity constants shown.

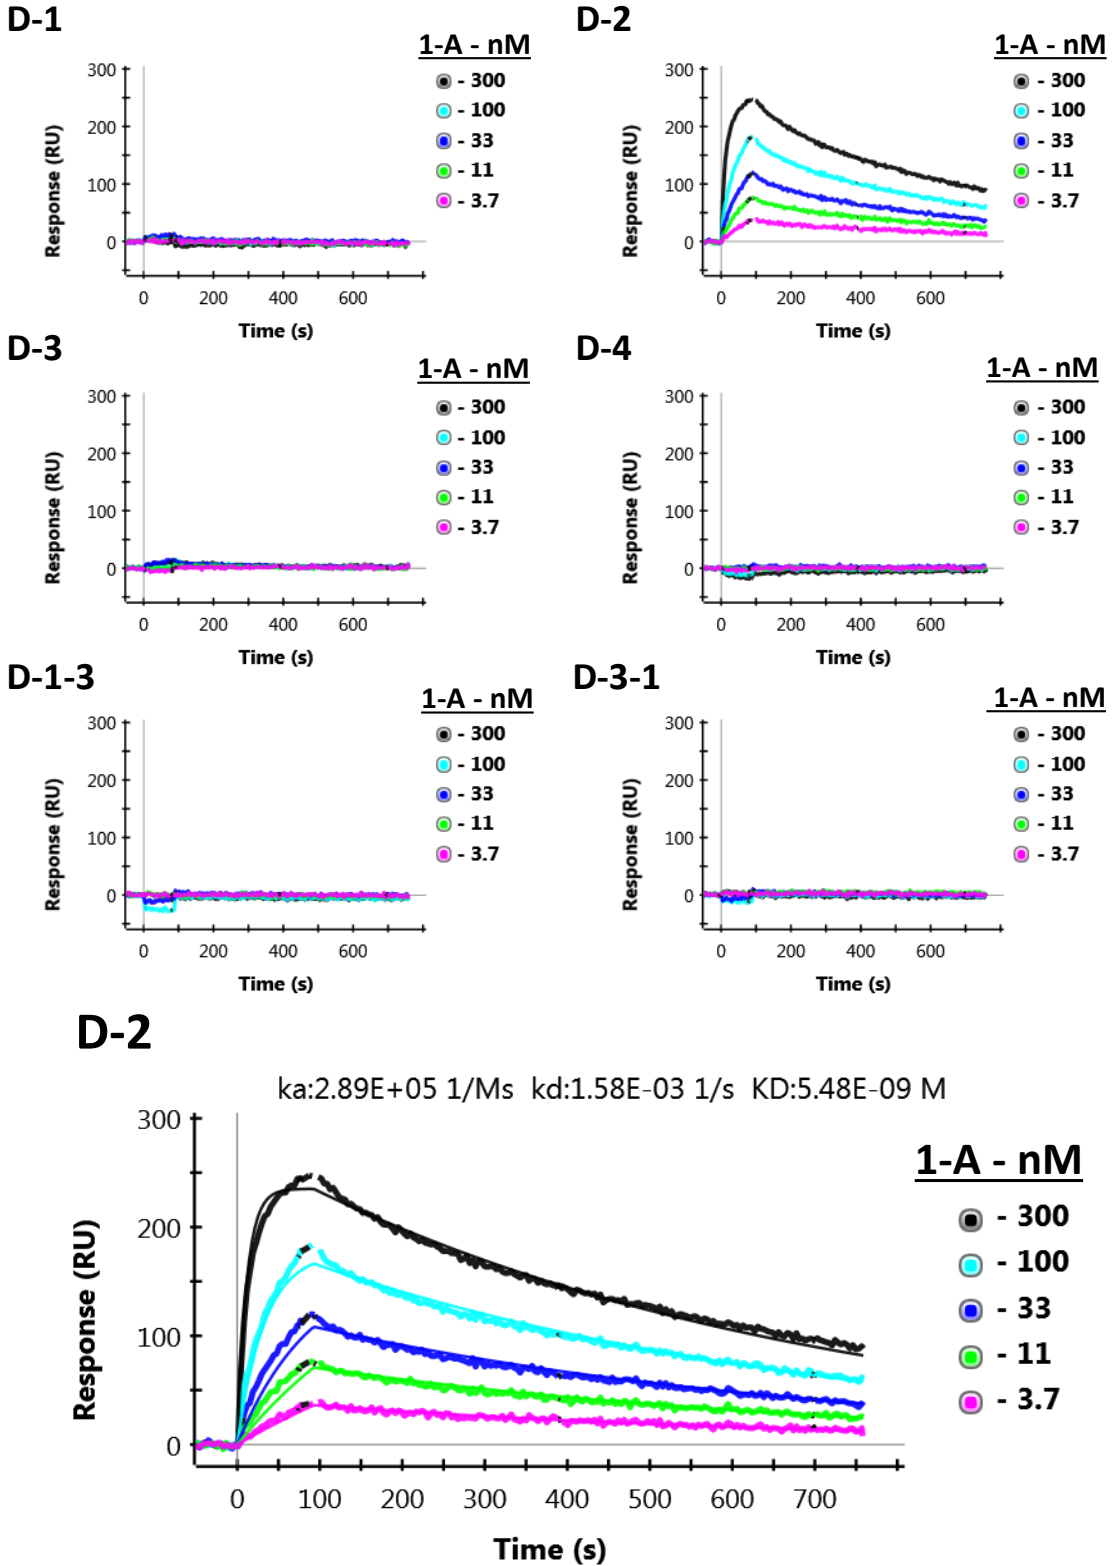

Figure S3-F Top- 3-A binding to D-1, D-1, D-3, D-4, D-1-3, D-3-1; Bottom – Enlarged view of 3-A binding to D-4 with affinity constants shown.

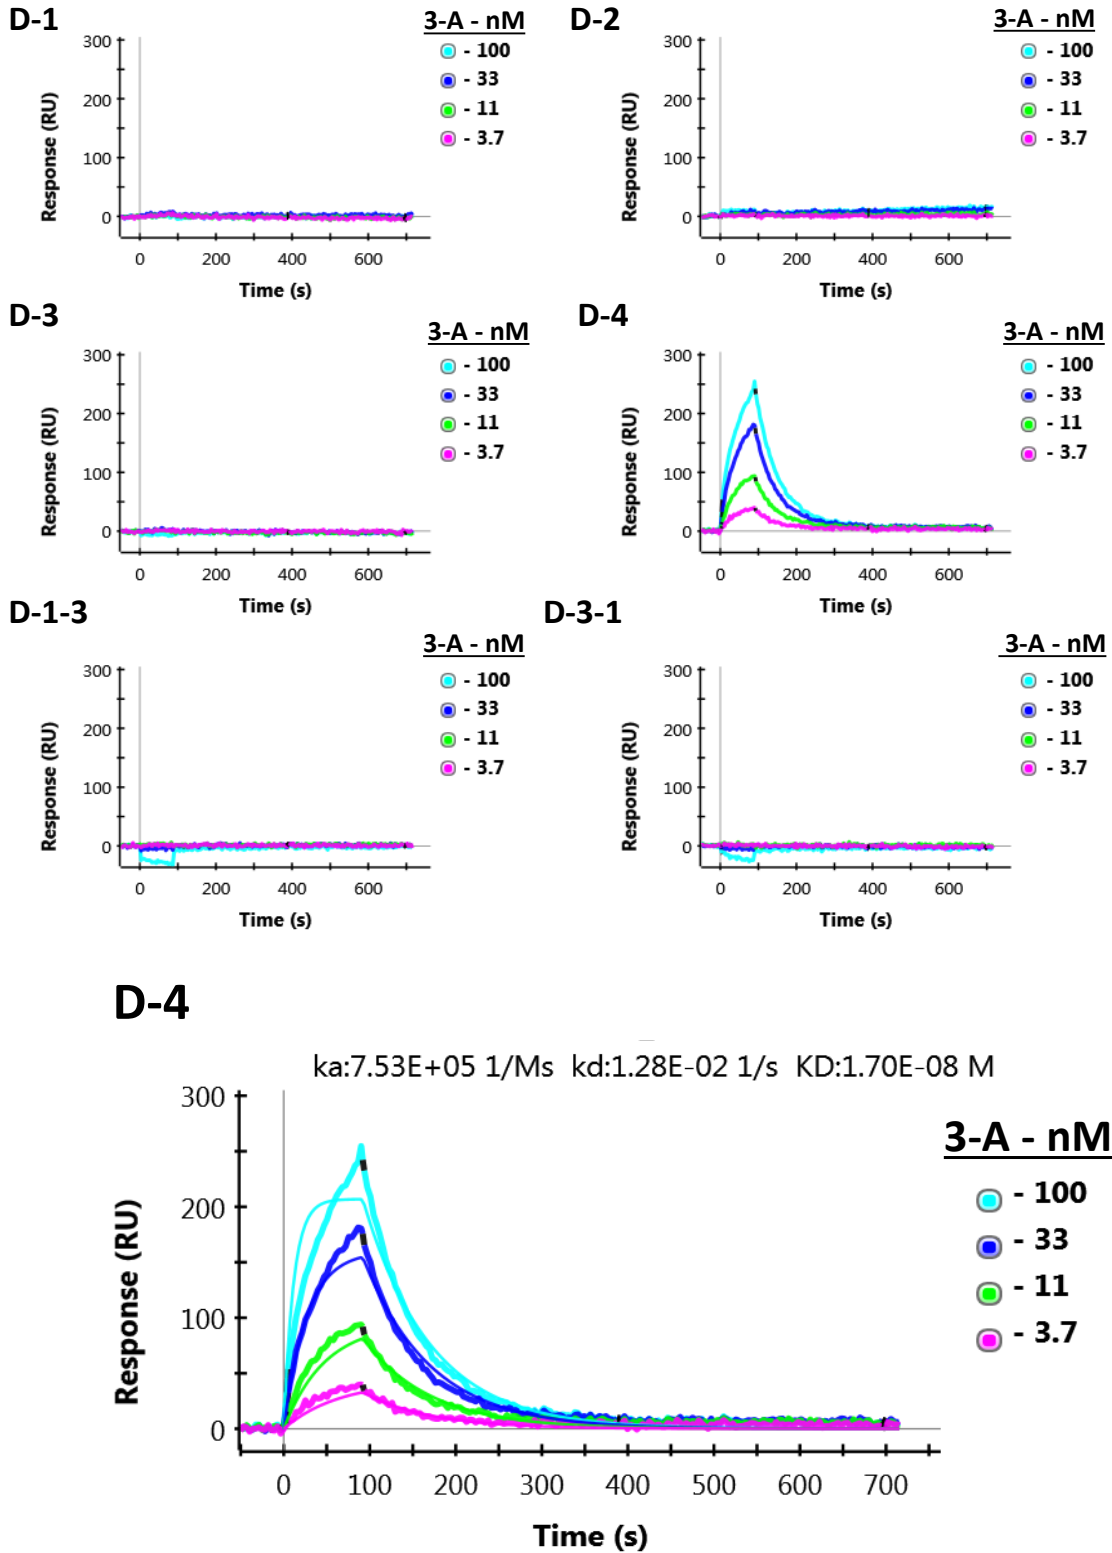

Figure S3-G: Top- 4-A binding to D-1, D-1, D-3, D-4, D-1-3, D-3-1; Bottom – Enlarged view of 4-A binding to D-3 with affinity constants shown.

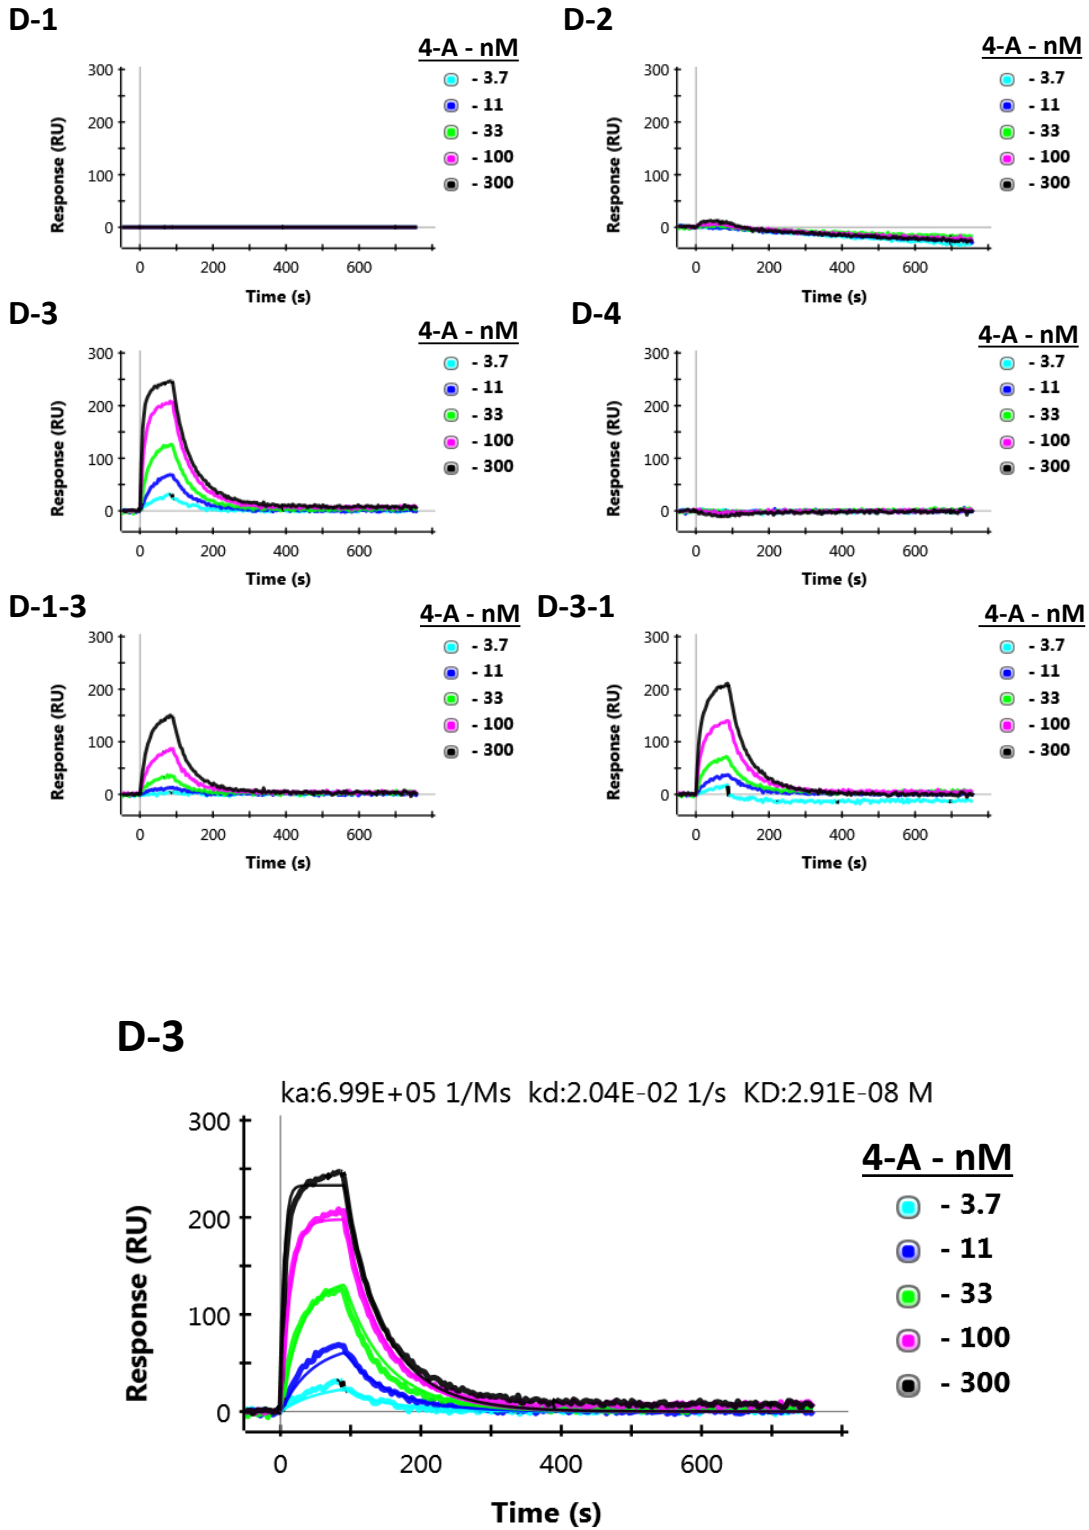



Figure S3-H: Top- A-1-A binding to D-1, D-1, D-3, D-4, D-1-3, D-3-1; Bottom – Enlarged view of A-1-A binding to D-2 with affinity constants shown.

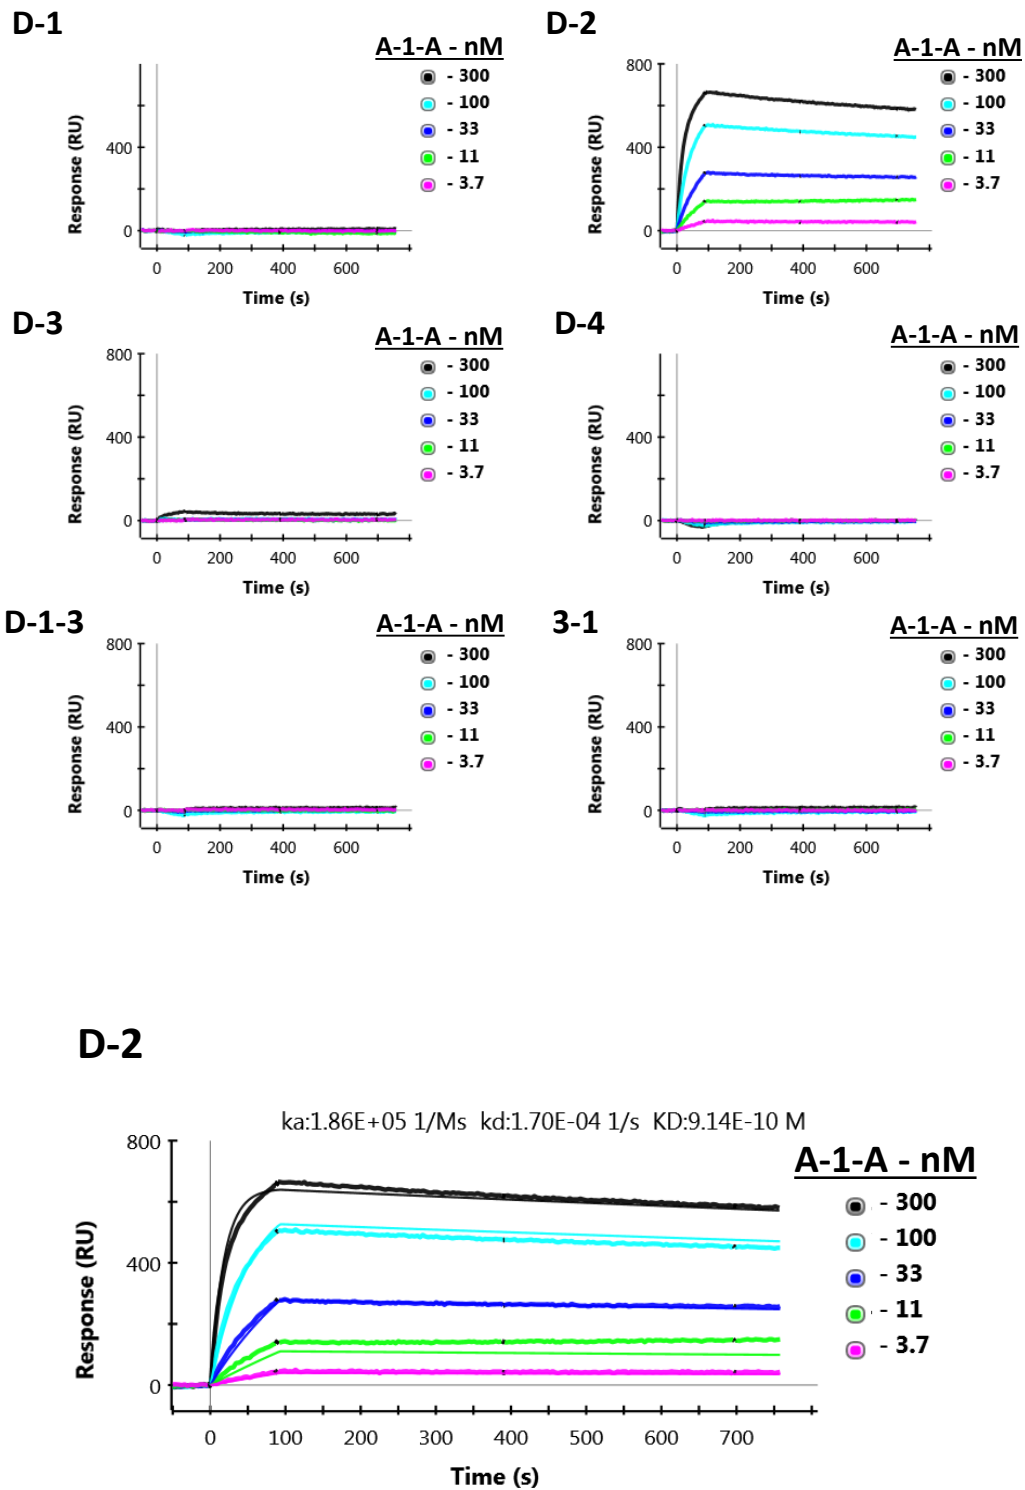

Figure S3-I: Top- A-5 binding to D-5, D-6, D-17, D-18, D-R34m, D-E34m; Bottom – Enlarged view of A-5 binding to D-6 with affinity constants shown.

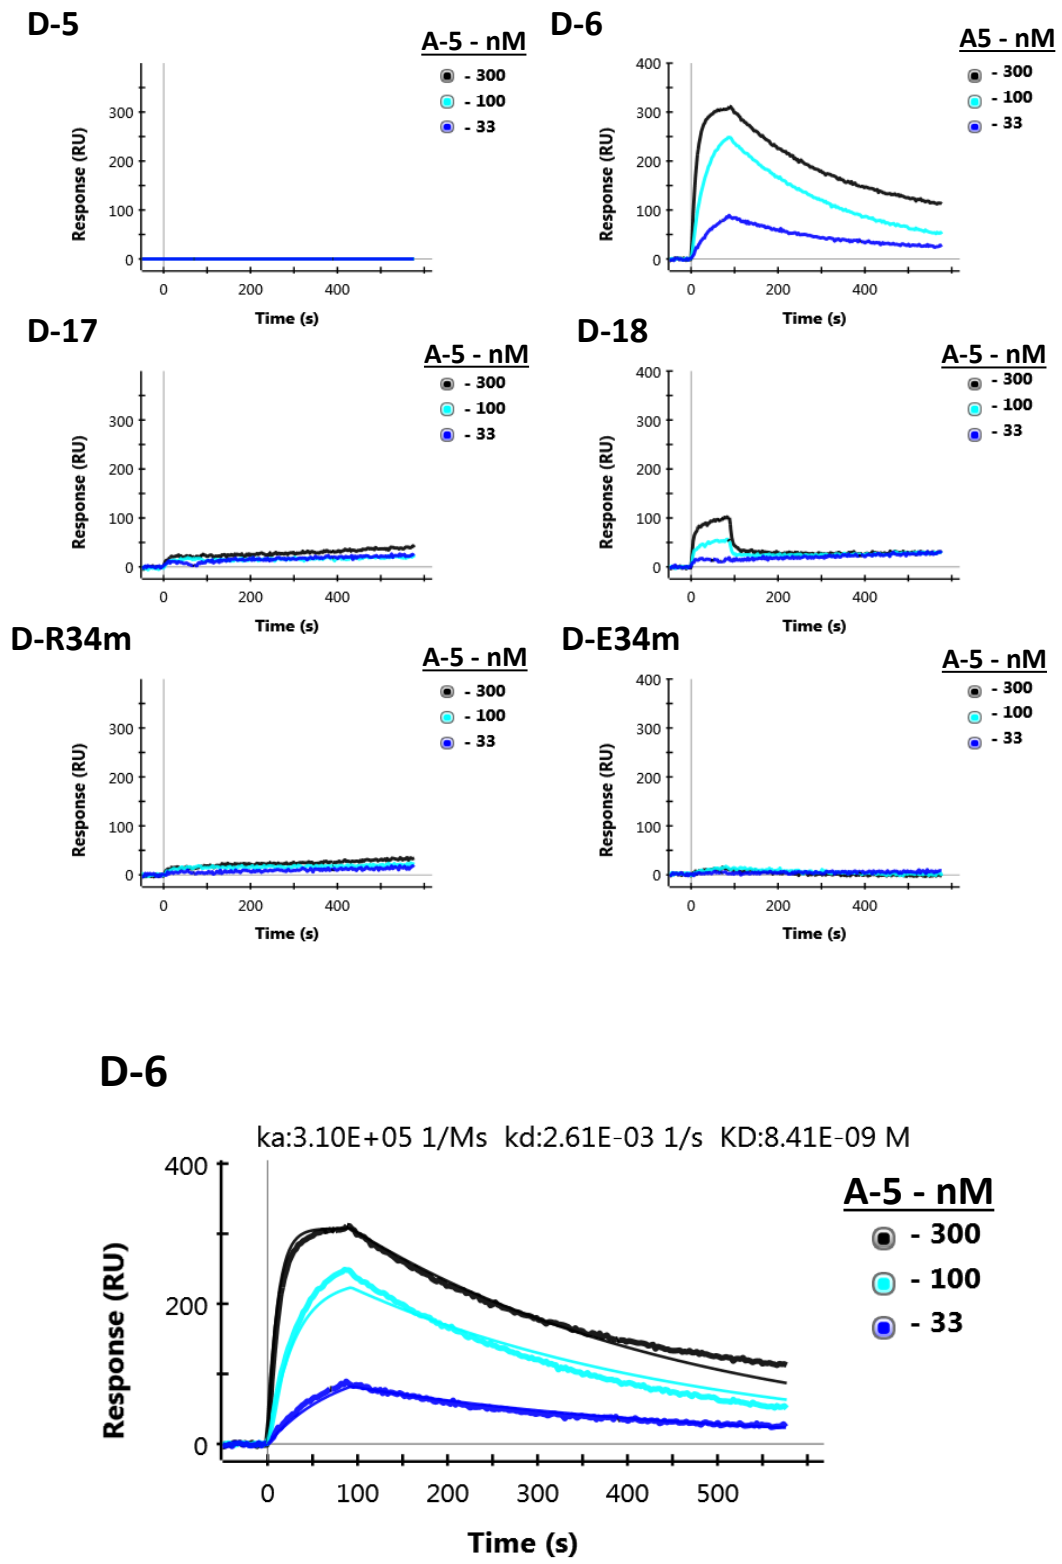

Figure S3-J: Top- A-6 binding to D-5, D-6, D-17, D-18, D-R34m, D-E34m; Bottom – Enlarged view of A-6 binding to D-5 with affinity constants shown.

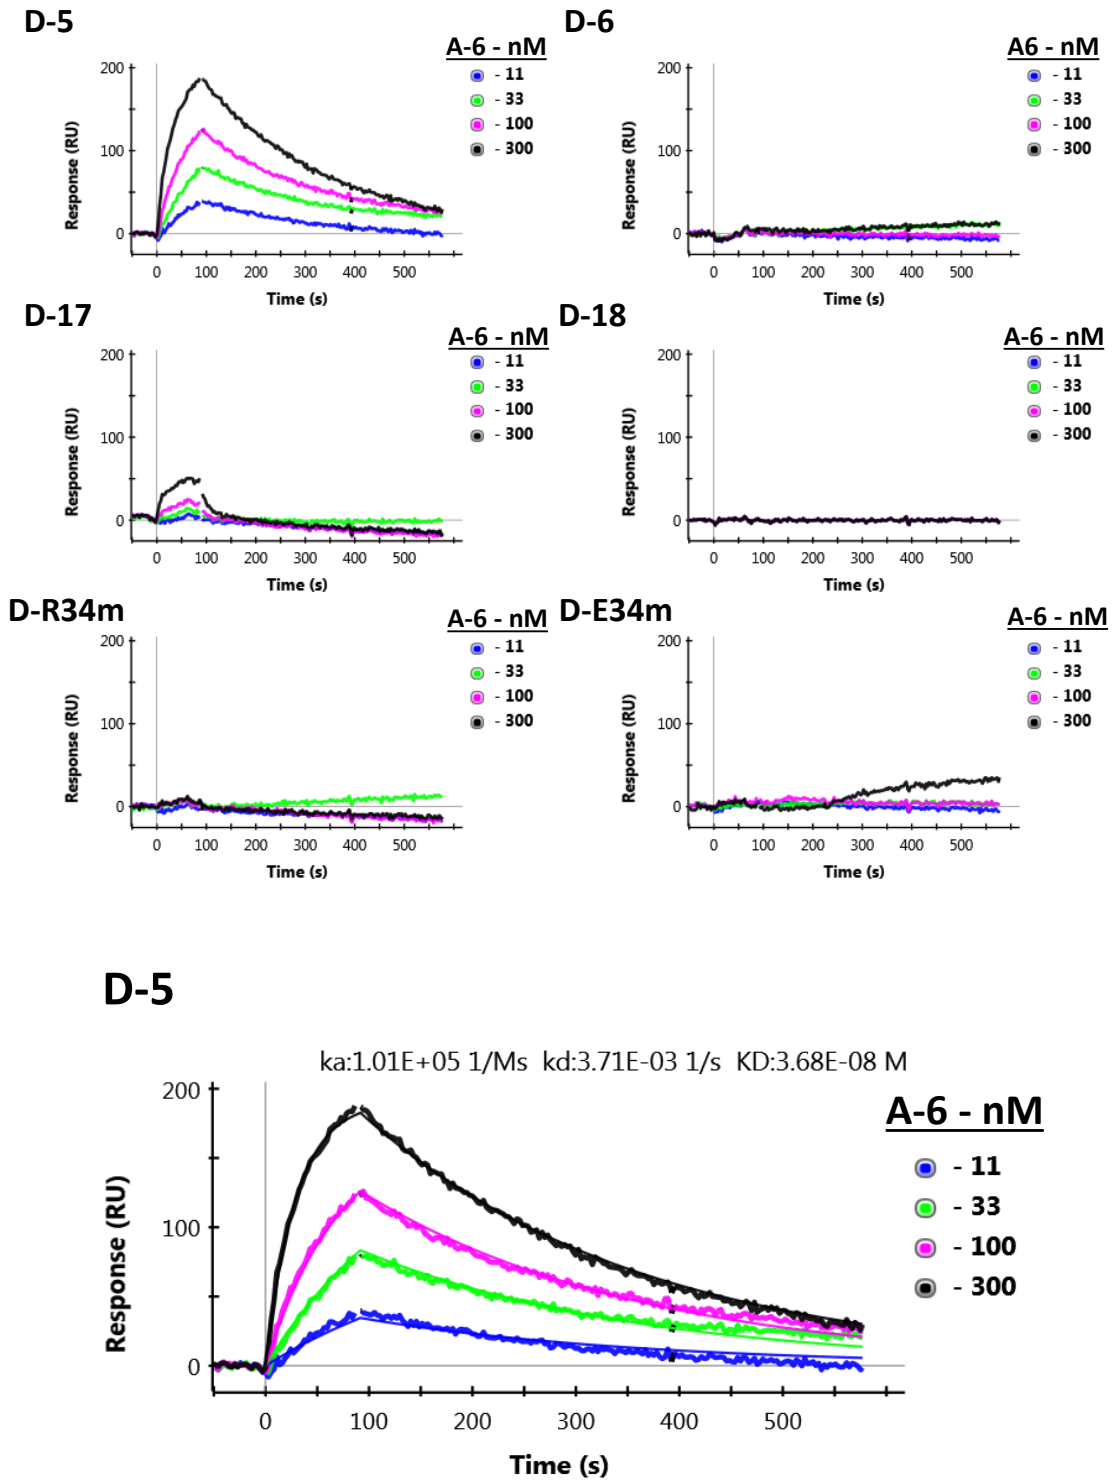

Figure S3-K: Top- A-17 binding to D-5, D-6, D-17, D-18, D-R34m, D-E34m; Bottom – Enlarged view of A-17 binding to D-18 with affinity constants shown.

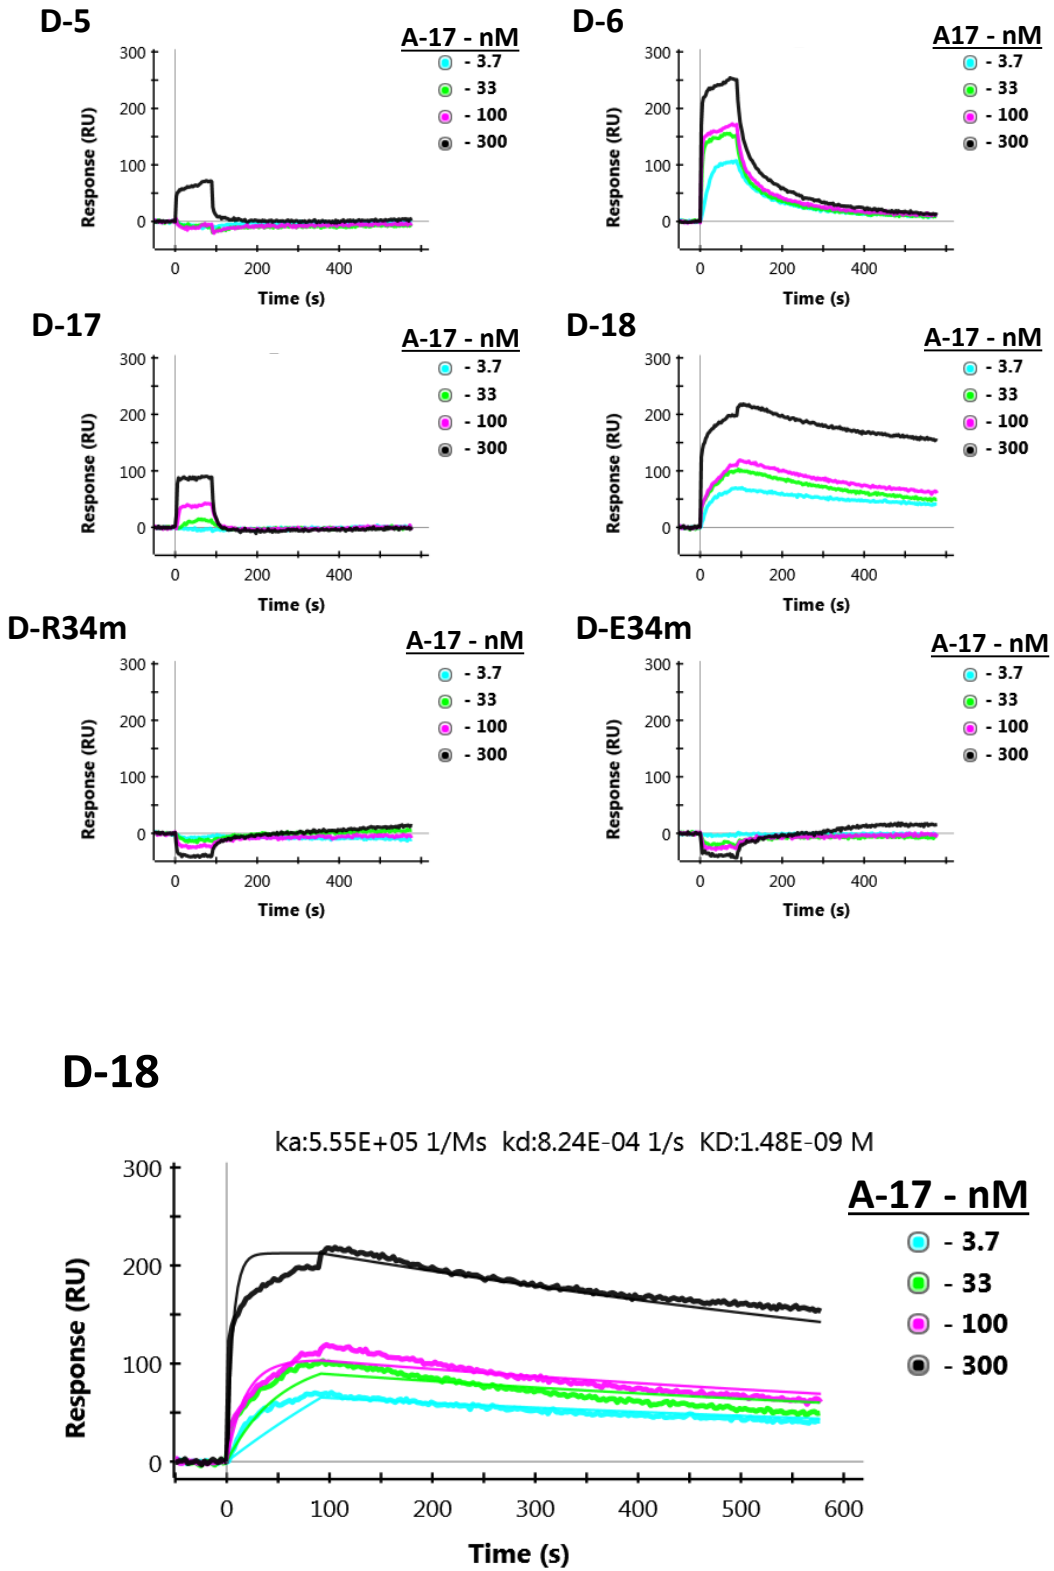

Figure S3-L Top- A-18 binding to D-5, D-6, D-17, D-18, D-R34m, D-E34m; Bottom – Enlarged view of A-18 binding to D-17 with affinity constants shown.

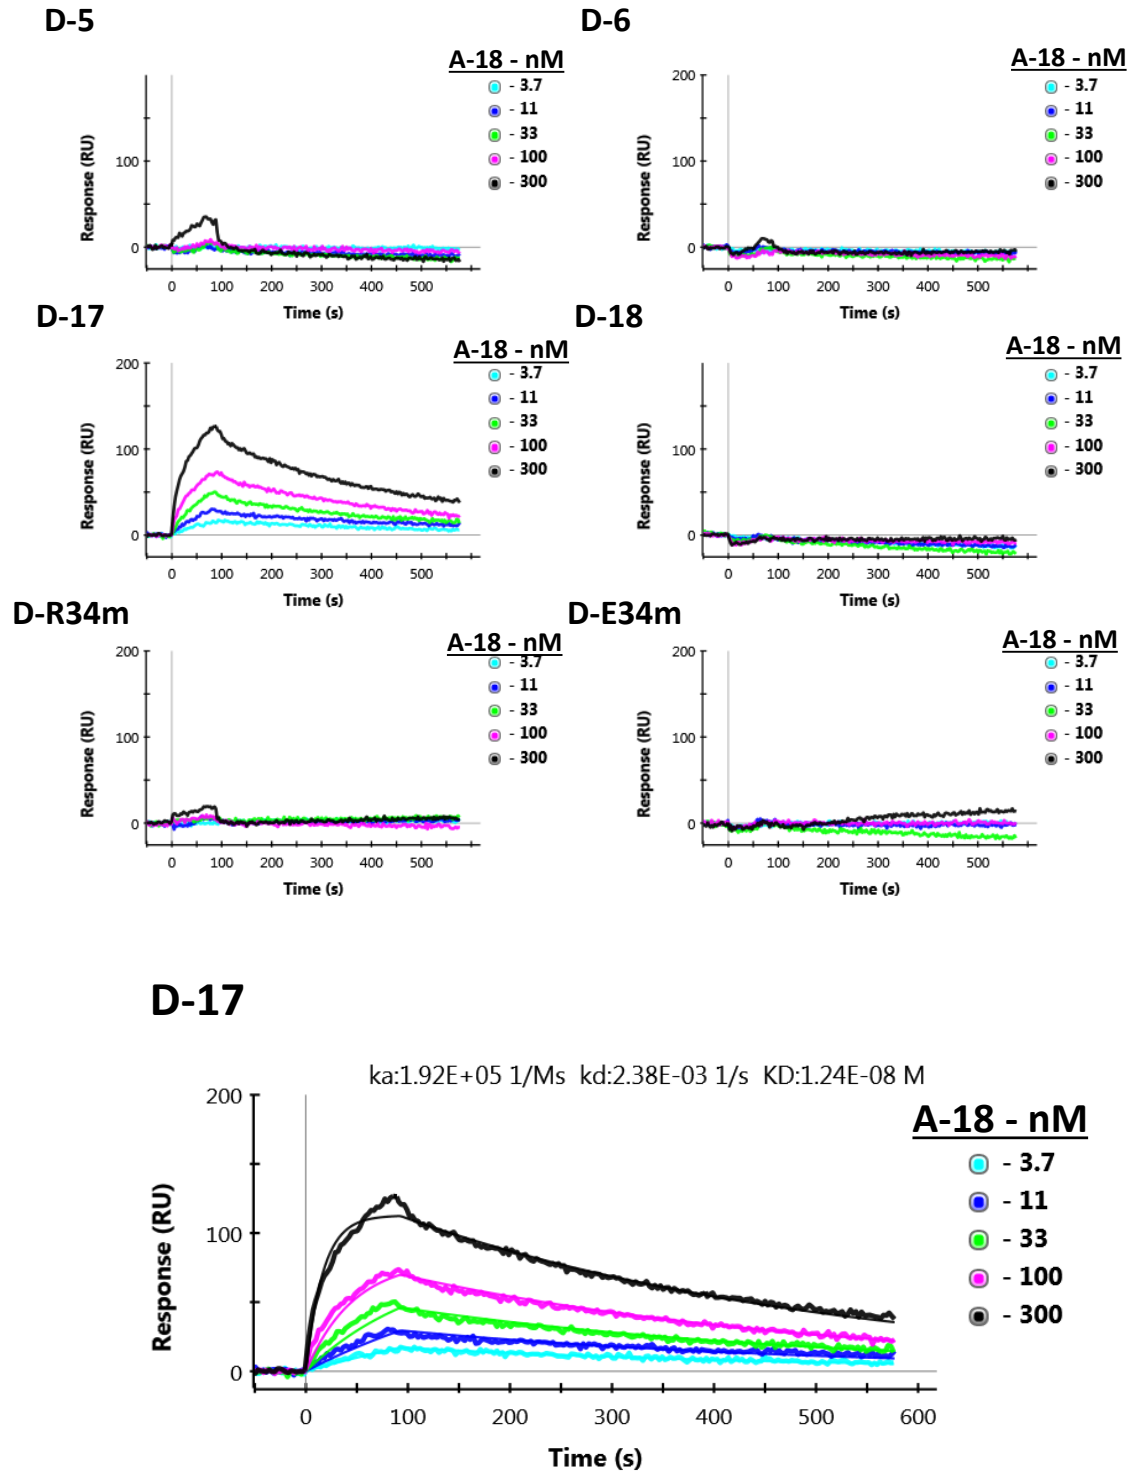

Figure S3-M: Top- A-R34m binding to D-5, D-6, D-17, D-18, D-R34m, D-E34m; Bottom – Enlarged view of A-R34m binding to D-E34m with affinity constants shown.

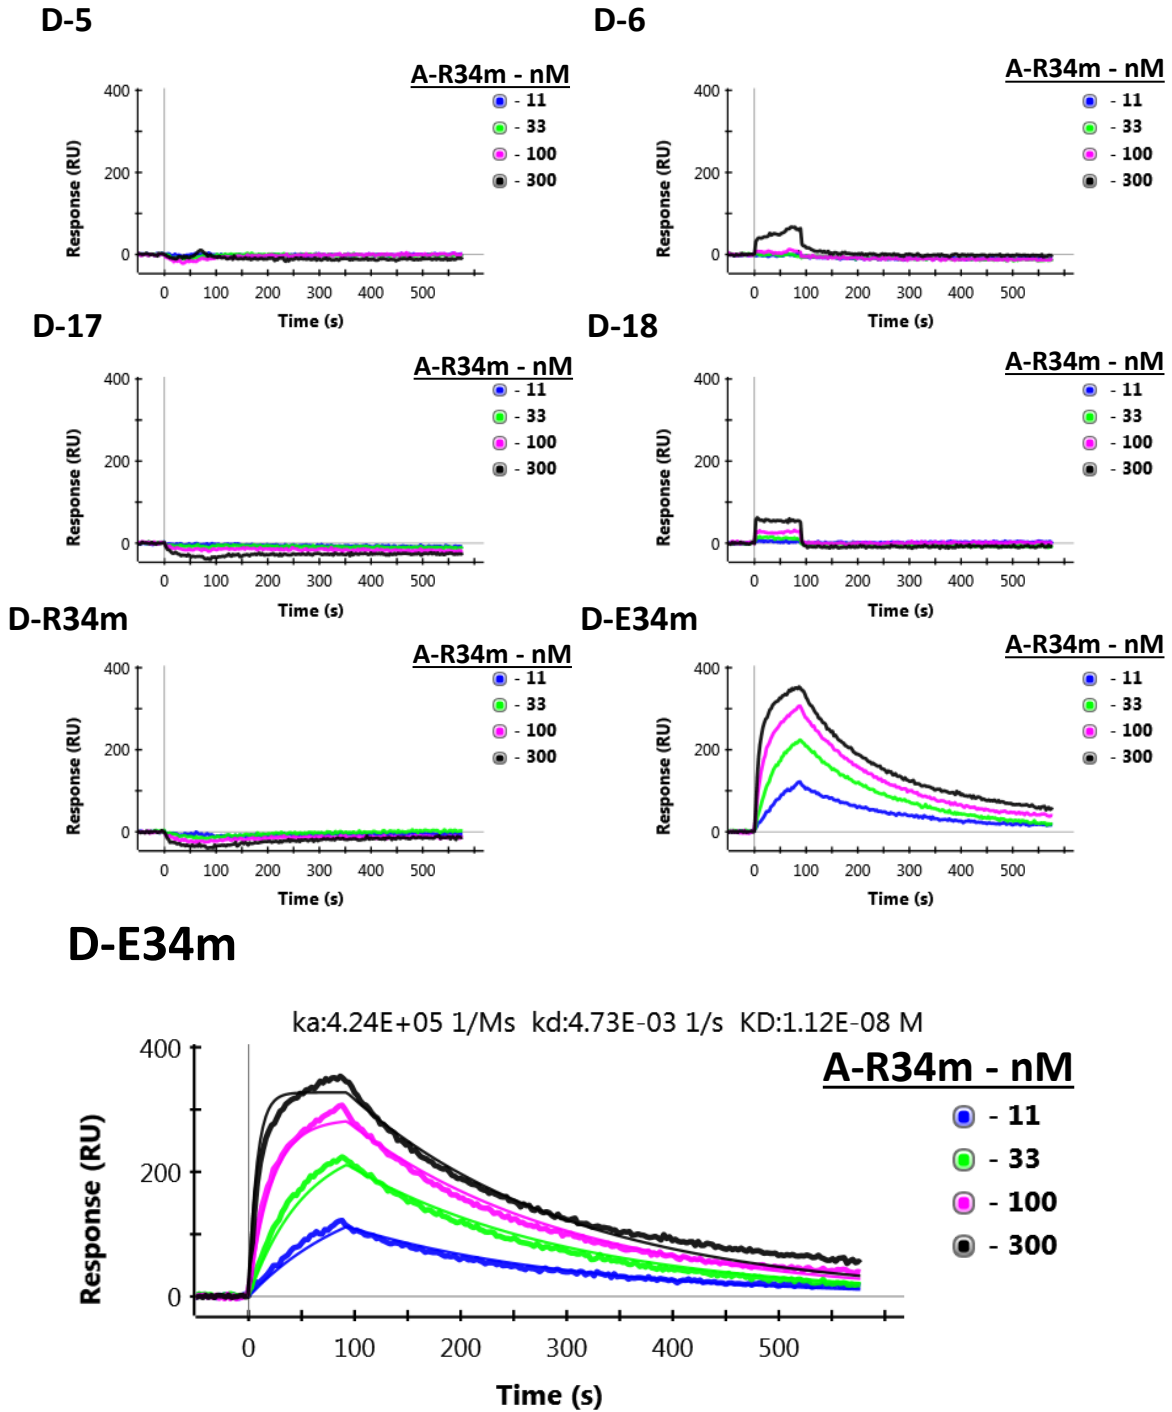

Figure S3-N: Top- A-18 binding to D-5, D-6, D-17, D-18, D-R34m, D-E34m; Bottom – Enlarged view of A-R34m binding to D-E34m with affinity constants shown

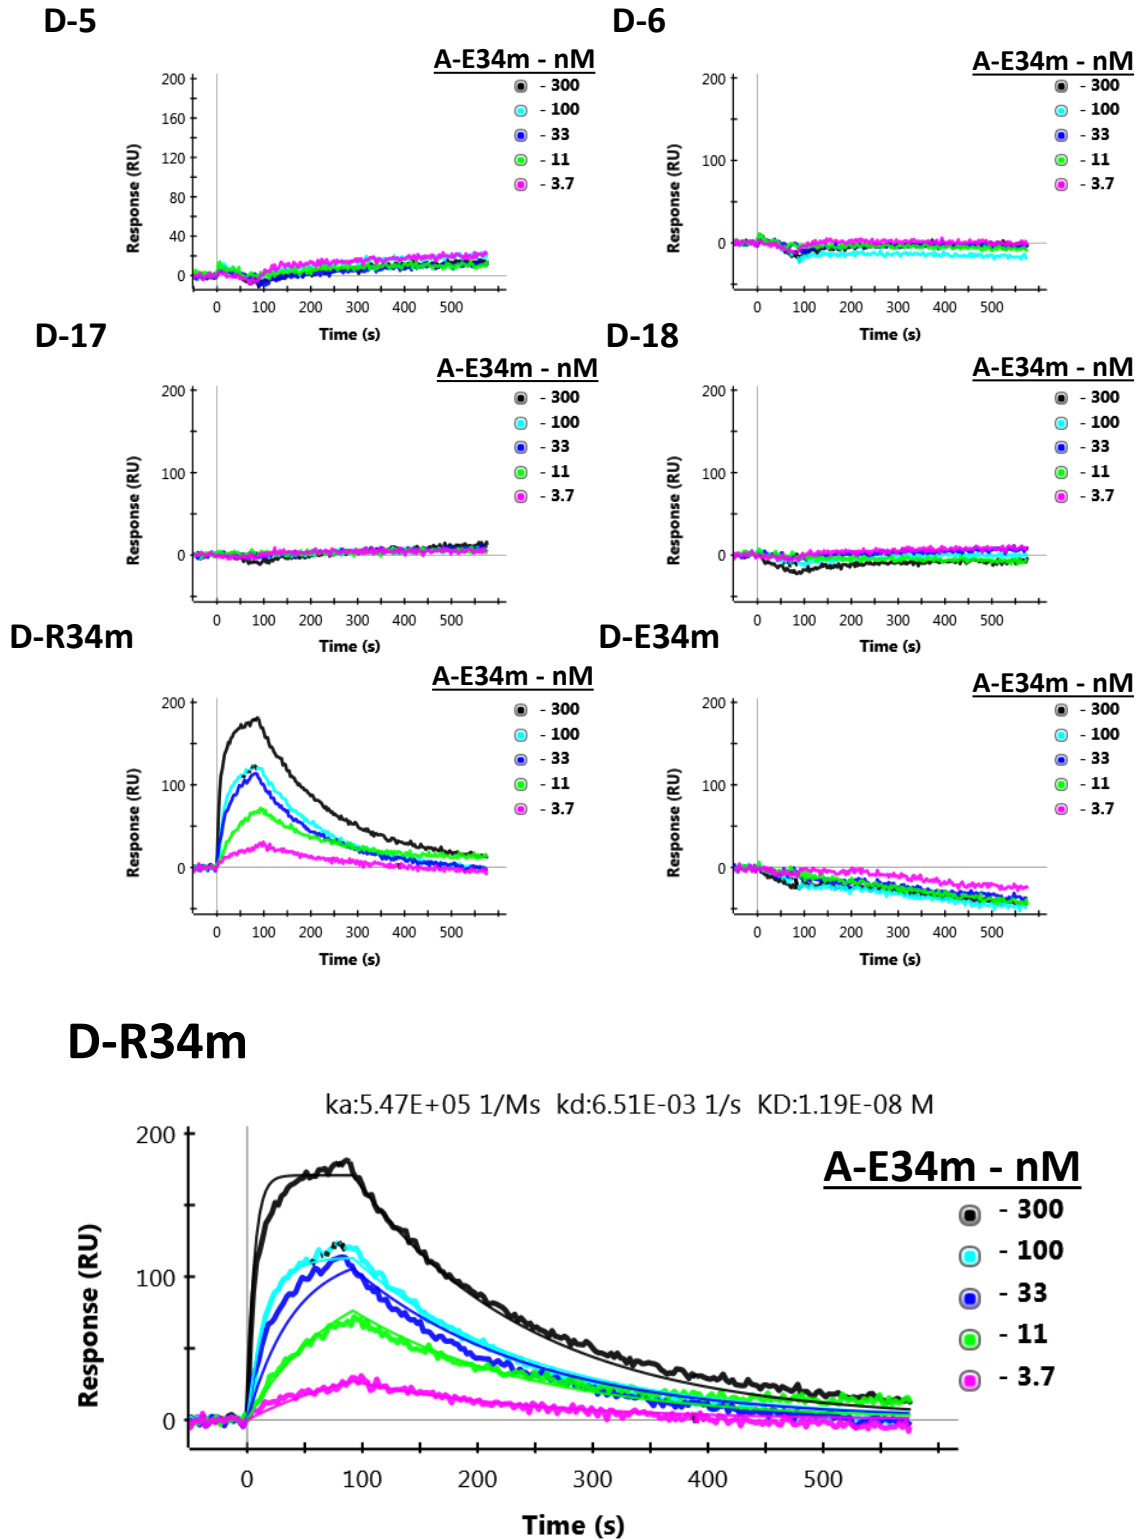

Figure S3-O: Top- A-3 binding to D-17; Bottom – A-4 binding to D-6 with affinity constants shown

**A-3 binding to D-17**

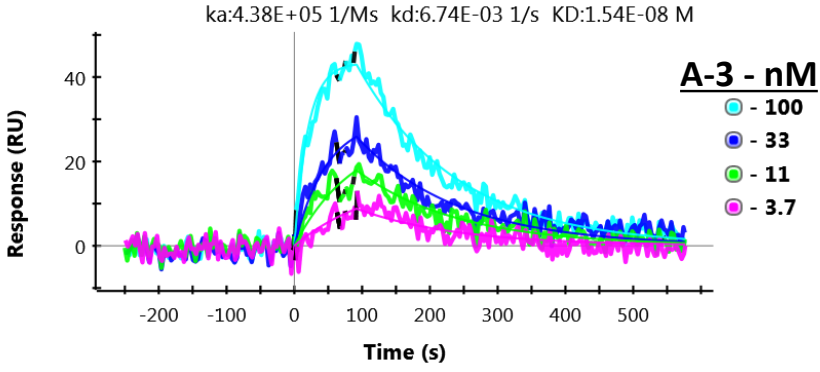

**A-4 binding to D-6**

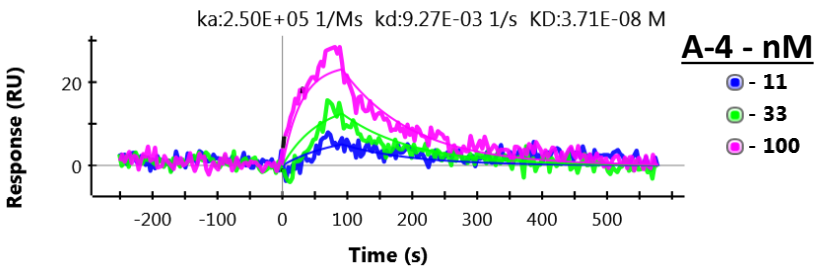



Figure S4. Size exclusion chromatography of individual components and mixes. The top panels show controls in which the D-3-1 (left) and D-1-3 (right) scaffolds were mixed with SYNZIPs A-1 and A-3. No assembly was observed with the control constructs (A-1 and A-3 with a D-1-3 or D-3-1 scaffold), as judged by the fact that the profile of the combinations was essentially the sum of the profile of the individual components. The bottom left panel shows that both A-2 and A-4 assembled on the D-1-3 scaffold as shown by the shift in size of the mixed samples. The combined peak for D-1-3, A-2, and A-4 elutes at 13.2026 mL versus an elution of 13.3159 mL for the D-1-3 and A-4 peak. The bottom right similarly shows A-2 and 4-A assembled on the D-1-3 scaffold. The combined D-1-3, A-2, 4-A peak elutes at 13.2179 mL versus 13.3999 mL for the combination of D-1-3 with 4-A. The concentration of all proteins was kept constant in each experiment.

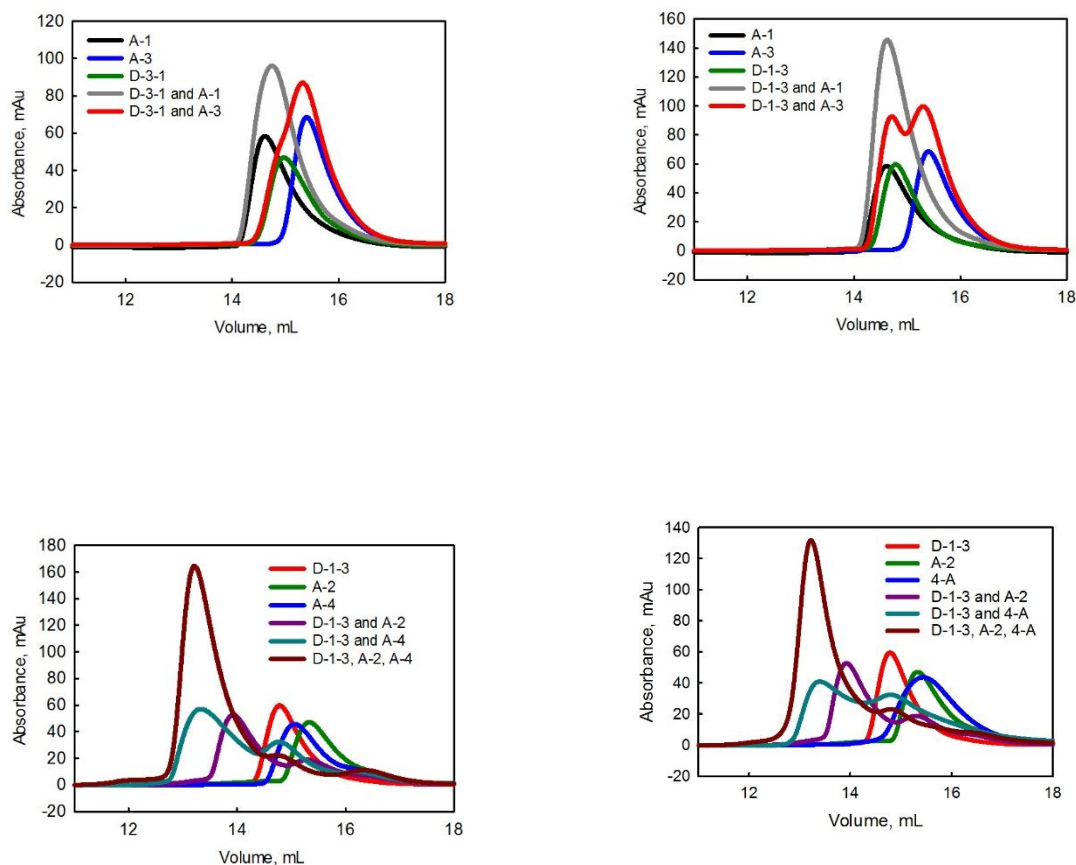

Table S1. Table of yields. Each of these constructs was produced and purified one or two times; typical yields are shown below.

| Clone name | Protein yield,<br>mg/L |
|------------|------------------------|
| D-5        | 25                     |
| D-6        | 17                     |
| D-17       | 16                     |
| D-18       | 4                      |
| D-E34m     | 23                     |
| D-R34m     | 1.1                    |
| A-5        | 5                      |
| A-6        | 12                     |
| A-17       | 7                      |
| A-18       | 9                      |
| A-E34m     | 13                     |
| A-R34m     | 1.3                    |

Table S2. Table of zipper charge

| Zipper    | Number Arg/Lys | Number Glu/Asp | Net Charge |
|-----------|----------------|----------------|------------|
| SYNZIP 1  | 9              | 10             | -1         |
| SYNZIP 2  | 11             | 10             | +1         |
| SYNZIP 3  | 9              | 8              | +1         |
| SYNZIP 4  | 11             | 10             | +1         |
| SYNZIP 5  | 8              | 10             | -2         |
| SYNZIP 6  | 11             | 10             | +1         |
| SYNZIP 17 | 14             | 8              | +6         |
| SYNZIP 18 | 6              | 11             | -5         |
| E34       | 7              | 8              | -1         |
| R34       | 10             | 5              | +5         |

Table S3. Binding affinities as determined by SPR

| In solution | Immobilized |         |         |         |
|-------------|-------------|---------|---------|---------|
|             | D-1, nM     | D-2, nM | D-3, nM | D-4, nM |
| A-5         | --          | --      | --      | --      |
| A-6         | --          | --      | --      | --      |
| A-17        | --          | 10      | 1.3     | --      |
| A-18        | --          | --      | --      | --      |
| A-R34m      | --          | --      | --      | --      |
| A-E34m      | --          | --      | --      | --      |

Figure S5. SPR data corresponding to Table S3. The top curve shows A-17 binding to D-2 while the bottom shows A-17 binding to D-3. The SYNZIP 17 is positively charged (see table S2), and we observed the non-specific binding shown below.

## A-17 binding to D-2

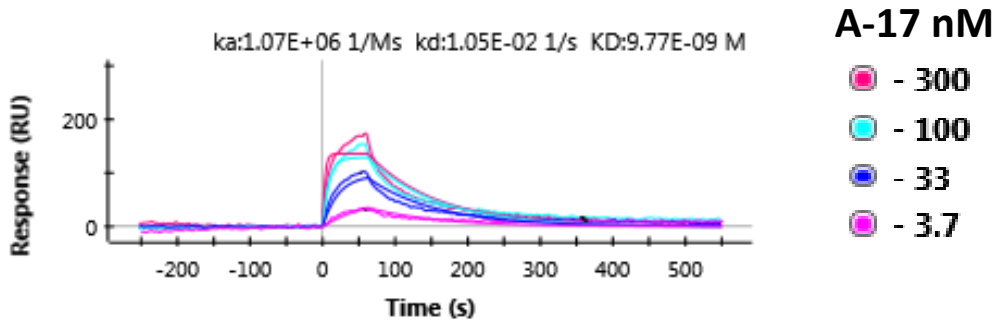

## A-17 binding to D-3

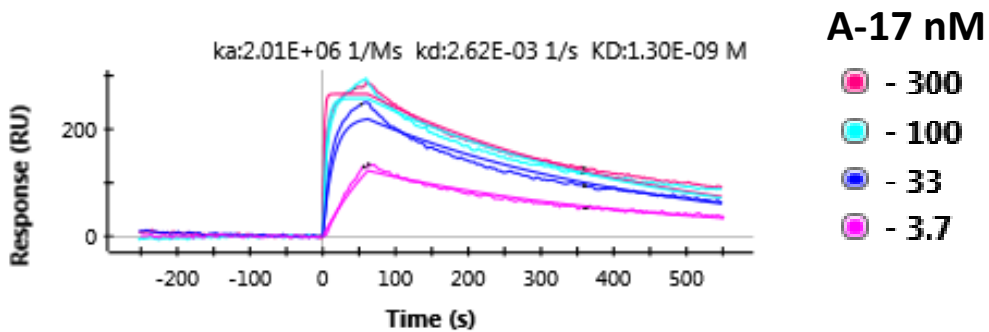

Supplement: ao8b00156_si_001.pdf [file ao8b00156_si_001.pdf]
